# Supplementary material for: Cyclooxygenase activity mediates colorectal cancer cell resistance to the omega-3 polyunsaturated fatty acid eicosapentaenoic acid
Source: Springer Nature journal article supplement (doi:10.1007/s00280-020-04157-2), 2020-10-11
Supplement: MOESM1 [file 18471284]

Cyclooxygenase activity mediates colorectal cancer cell resistance to the omega-3 polyunsaturated fatty acid eicosapentaenoic acid. Cancer Chemotherapy and Pharmacology. Milene Volpato, Nicola Ingram, Sarah L Perry, Jade Spencer, Amanda D Race, Catriona Marshall, John M Hutchinson, Anna Nicolaou, Paul M Loadman, P Louise Coletta and Mark A Hull.

Corresponding author contact: Leeds Institute of Medical Research at St James's, University of Leeds, St James's University Hospital, Leeds LS9 7TF, United Kingdom, [m.volpato@leeds.ac.uk](mailto:m.volpato@leeds.ac.uk)

**Table S1:** MC38r resistance to EPA is stable over time. IC<sub>50</sub> values were obtained for MC38r cells over time (38 passages), using the MTT assay following 96 hr exposure to EPA-FFA.

| Time post MC38r cell isolation (months) | IC <sub>50</sub> (mean ± SEM)* |
|-----------------------------------------|--------------------------------|
| 1                                       | 163.2 ± 1.0 (n=3)              |
| 9                                       | 146.7 ± 1.3 (n=3)              |
| 15                                      | 135.3 ± 1.2 (n=6)              |
| 21                                      | 145.3 ± 1.4 (n=3)              |
| 33                                      | 138.5 ± 1.2 (n=3)              |
| 41                                      | 172.4 ± 1.1 (n=2)              |
| 51                                      | 184.1 ± 1.1 (n=7)              |

\*IC<sub>50</sub> values are µM
