# Supplementary material for: Cyclooxygenase activity mediates colorectal cancer cell resistance to the omega-3 polyunsaturated fatty acid eicosapentaenoic acid
Source: Springer Nature journal article supplement (doi:10.1007/s00280-020-04157-2), 2020-10-11
Supplement: MOESM4 [file 18471284]

Cyclooxygenase activity mediates colorectal cancer cell resistance to the omega-3 polyunsaturated fatty acid eicosapentaenoic acid. Cancer Chemotherapy and Pharmacology. Milene Volpato, Nicola Ingram, Sarah L Perry, Jade Spencer, Amanda D Race, Catriona Marshall, John M Hutchinson, Anna Nicolaou, Paul M Loadman, P Louise Coletta and Mark A Hull.

Corresponding author contact: Leeds Institute of Medical Research at St James's, University of Leeds, St James's University Hospital, Leeds LS9 7TF, United Kingdom, m.volpato@leeds.ac.uk

**Table S3:** Differential gene expression in MC38 and MC38r mouse CRC cells

| Gene symbol | Gene name                                | Proposed function (IPA® analysis) | Fold-change in transcript level - EPA-treated MC38 cells compared with untreated MC38 cells (array 1) | Fold-change in transcript level - MC38r cells compared with MC38 cells (array 2) |
|-------------|------------------------------------------|-----------------------------------|-------------------------------------------------------------------------------------------------------|----------------------------------------------------------------------------------|
| Lox         | Lysyl oxidase                            | collagen cross-linking            | +2.4                                                                                                  | -185.3                                                                           |
| Col6a1      | Collagen                                 | extracellular matrix              | +2.1                                                                                                  | -7.0                                                                             |
| P4ha1       | Prolyl 4-hydroxylase $\alpha 1$          | folding of collagen chain         | +2.1                                                                                                  | -2.6                                                                             |
| Mrgprf      | Mas-related G-coupled protein receptor F | orphan GPCR                       | +2.3                                                                                                  | -3.5                                                                             |
| Angptl6     | Angiopoietin-like 6                      | chemo-attraction and inflammation | -2.6                                                                                                  | +18.8                                                                            |
| Ptgs1       | Cyclooxygenase-1                         | prostaglandin synthesis           | No significant change                                                                                 | +3.2                                                                             |

+, increase; -, decrease
